# Supplementary material for: Impact of primary tumor sidedness and sex on prognosis and anti-epidermal growth factor receptor antibody efficacy in BRAF-mutant metastatic colorectal cancer: a pooled analysis of AIO studies FIRE-1, CIOX, FIRE-3, XELAVIRI, and VOLFI
Source: PubMed Central journal article supplement (PMC11387224; doi:10.1016/j.esmoop.2024.103677), 2024-08-21
Supplement: mmc2.pdf [file mmc2.pdf]

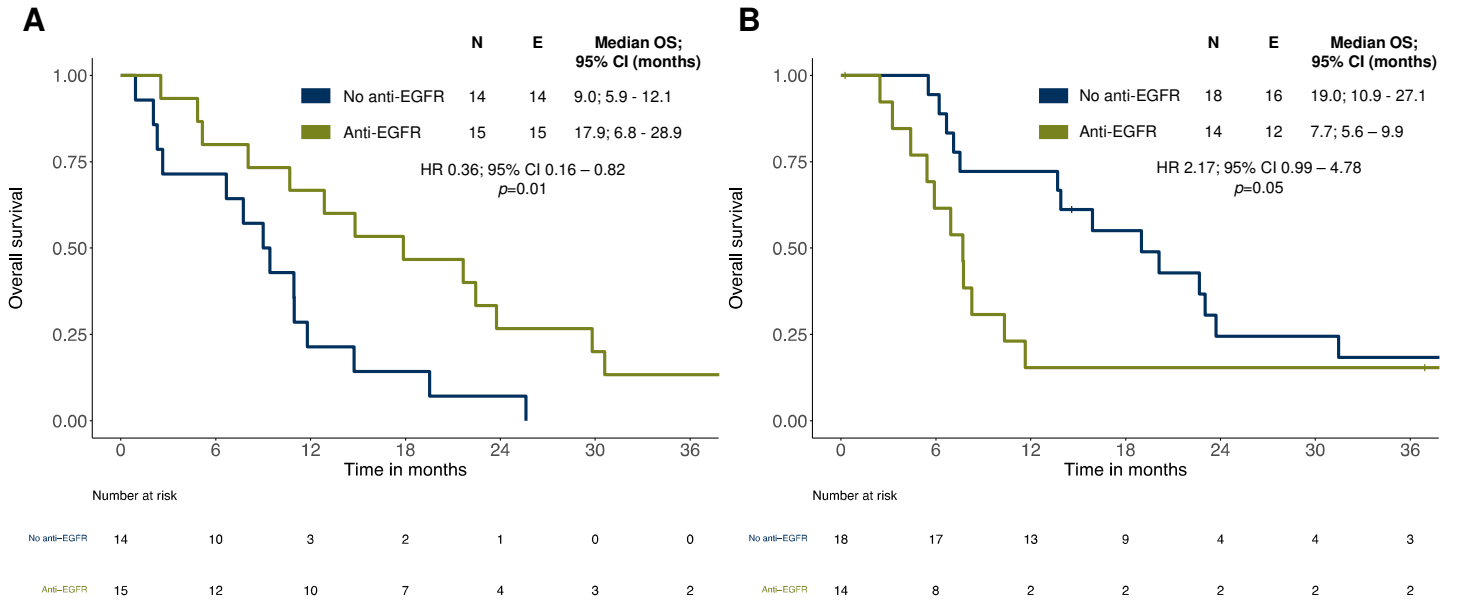

**Supplementary Figure 2: OS according to treatment with or without anti-EGFR mAb regarding sidedness in the subset of patients treated in the FIRE-3 and VOLFI study**

**A** - OS in LSPT according to treatment with or without anti-EGFR in BRAFmt mCRC

**B** - OS in RSPT according to treatment with or without anti-EGFR in BRAFmt mCRC
